# Supplementary material for: Light-controlled propulsion, aggregation and separation of water-fuelled TiO2/Pt Janus submicromotors and their “on-the-fly” photocatalytic activities
Source: Royal Society of Chemistry journal article supplement (doi:10.1039/c5nr06774j), 2015-11-04
Supplement: c5nr06774j1.pdf [file c5nr06774j1.pdf]

## Supporting Information

### Light-Controlled Propulsion, Aggregation and Separation of Water-Fuelled $\text{TiO}_2/\text{Pt}$ Janus Submicromotors and Their “on-the-fly”

#### Photocatalytic Activities

Fangzhi Mou,<sup>†</sup> Lei Kong,<sup>†</sup> Chuanrui Chen, Zhihong Chen, Leilei Xu and Jianguo Guan\*  
State Key Laboratory of Advanced Technology for Materials Synthesis and Processing, Wuhan University of Technology; 122 Luoshi Road, Wuhan 430070, China; Fax: (+86)-27-87879468, E-mail: [guanjg@whut.edu.cn](mailto:guanjg@whut.edu.cn).

#### Supporting Figures

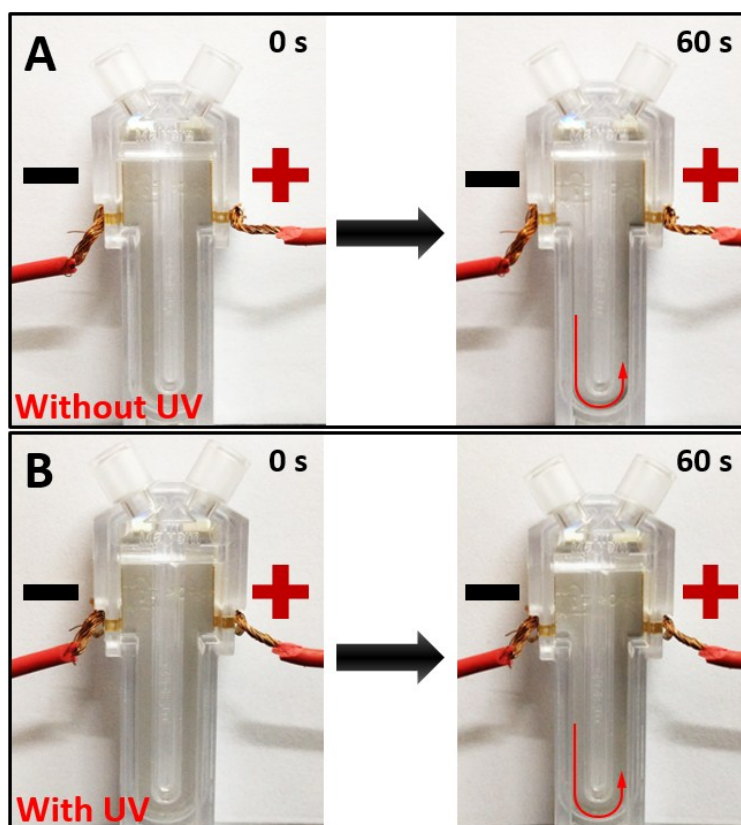

Figure S1. The electrophoretic mobility of the  $\text{TiO}_2/\text{Pt}$  Janus submicromotors in water under an electric field of 500 V (A) without or (B) with UV irradiation ( $1\text{W cm}^{-2}$ ). The increasing color contrast between two electrodes reveals that the  $\text{TiO}_2/\text{Pt}$  Janus submicromotors exhibit a net negative charge with or without UV irradiation. Red arrows in the figures represent the motion direction of the  $\text{TiO}_2/\text{Pt}$  Janus submicromotors.

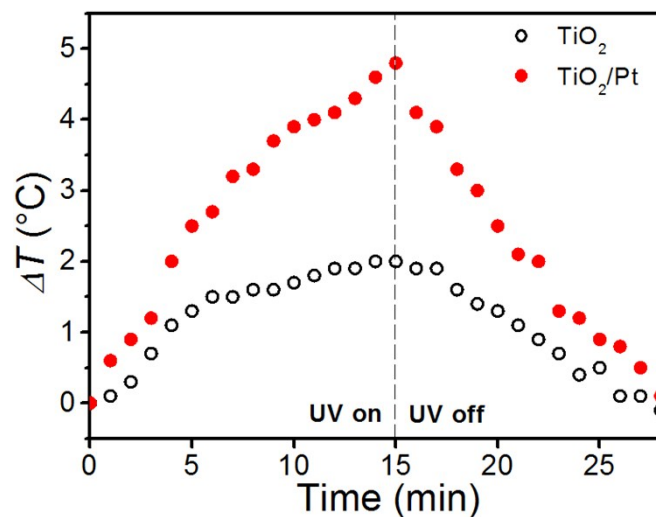

Figure S2. The temperature change ( $\Delta T$ ) of water containing  $\text{TiO}_2$  and  $\text{TiO}_2/\text{Pt}$  particles ( $0.2 \text{ mg mL}^{-1}$ ) response to UV ( $368 \text{ nm}$ ,  $1 \text{ W cm}^{-2}$ ) on and off for different times.

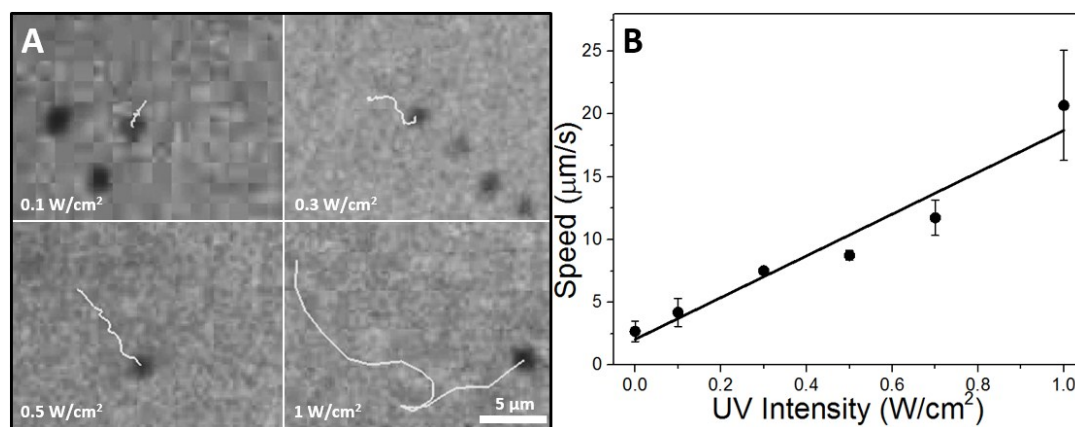

Figure S3. (A) The propulsion and trajectories (white curves) of the  $\text{TiO}_2/\text{Pt}$  submicromotors under UV irradiation in 1 s with different UV intensity: 0.1, 0.3, 0.5 and  $1 \text{ W cm}^{-2}$ ; (B) Speed of the  $\text{TiO}_2/\text{Pt}$  Janus submicromotors *versus* UV intensity.

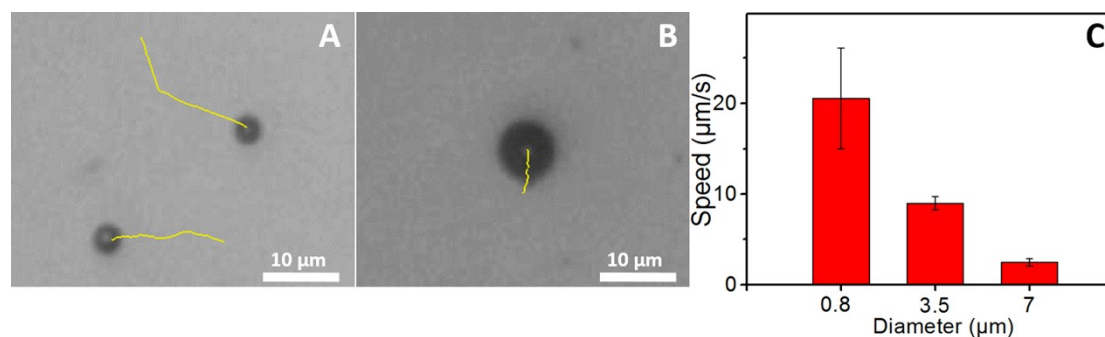

Figure S4. Trajectories of  $\text{TiO}_2/\text{Pt}$  micromotors with diameters of (A) 3.5 and (B)  $7 \text{ μm}$  in water under UV irradiation within a period of 2 s. (C) Speed of the  $\text{TiO}_2/\text{Pt}$  Janus micromotors *versus* diameters.

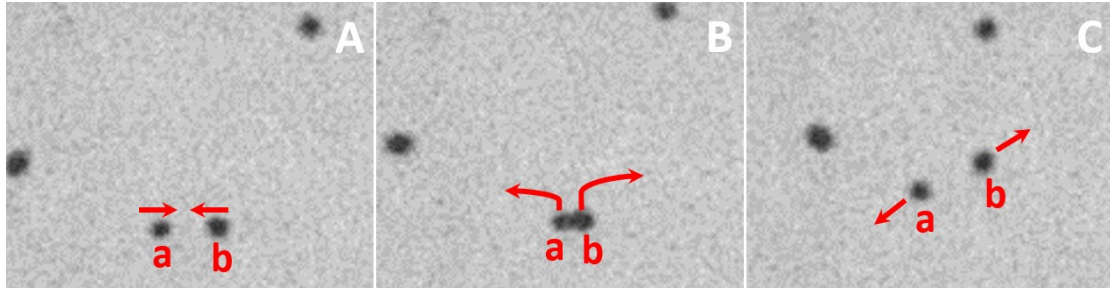

Figure S5. The (A) approach, (B) collision and (C) separation of two TiO<sub>2</sub>/Pt Janus submicromotors at different time intervals: (A) 0, (B) 0.2 and (C) 0.6 s, respectively.

## Calculation of the Electrostatic Force

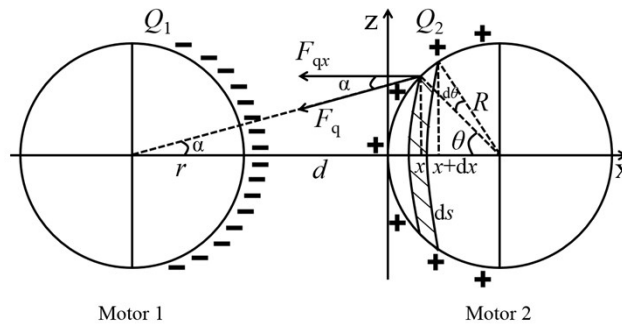

Figure S6. Electrostatic interaction between two TiO<sub>2</sub>/Pt Janus submicromotors.

In Figure S6, Motor 1 and 2 with the radius of  $r$  and  $R$  represent two approaching TiO<sub>2</sub>/Pt Janus submicromotors with asymmetric surface charges  $Q_1$  and  $Q_2$ , respectively. We assume that the charges  $Q_1$  and  $Q_2$  are equally spread on the surfaces of Motor 1 and 2. Electrostatic force exerted on Motor 2 in the electric field ( $E_{Q_1}$ ) produced by Motor 1 can be described as the superposition of all the infinite number of charged circular global belt with surface area of  $ds$ :

$$ds = 2\pi R^2 \sin \theta d\theta$$

as,

$$Rd\theta = \frac{dx}{\sin \theta}$$

So,

$ds = 2\pi R dx$  Hence, the charges ( $q$ ) on the circular global belt is,

$$q = \frac{Q_2}{2\pi R^2} 2\pi R dx = \frac{Q_2}{R} dx$$

and the electrostatic force ( $F_{qx}$ ) on the circular global belt is,

$$F_{qx} = F_q \cos \alpha = E_{Q_1} q \cos \alpha = \frac{r + d + x}{\sqrt{(r + d + x)^2 + 2Rx - x^2}} E_{Q_1} \frac{Q_2}{R} dx$$

As,

$$E_{Q_1} = \frac{Q_1}{4\pi\epsilon_0[(r+d+x)^2 + 2Rx - x^2]}$$

The net electrostatic force ( $F$ ) on Motor 2 can be calculated as follow,

$$F = \sum F_{qx} = \int_0^R \frac{Q_1 Q_2 (r+d+x)}{4\pi\epsilon_0 R [(r+d+x)^2 + 2Rx - x^2]^{\frac{3}{2}}} dx = \frac{Q_1 Q_2}{4\pi\epsilon_0 R (r+d+R)^2} \left[ R + \right.$$
